# Supplementary material for: Microwave-assisted derivatization for fast and efficient analysis of saccharides on disposable microchips
Source: Royal Society of Chemistry journal article supplement (doi:10.1039/c4ra07934e), 2014-01-01
Supplement: c4ra07934e1.pdf [file c4ra07934e1.pdf]

## Electronic Supplementary Information

### **Microwave-assisted derivatization for fast and efficient analysis of saccharides on disposable microchips**

Jinxiu Guo, Shenghong Yang, Xianglu Peng, Fengyun Li, Lei Zhou, Qiaosheng Pu\*

*State Key Laboratory of Applied Organic Chemistry, Key Laboratory of Nonferrous Metals Chemistry and Resources Utilization of Gansu Province, Department of Chemistry, Lanzhou University, Lanzhou, Gansu 730000, China*

\* Corresponding author

Department of Chemistry, Lanzhou University, 222 Southern Tianshui Road, Lanzhou 730000, China.

Tel: +86 931 8913813, Fax: +86 931 891 2582.

E-mail address: [puqs@lzu.edu.cn](mailto:puqs@lzu.edu.cn) (Q.S. Pu)

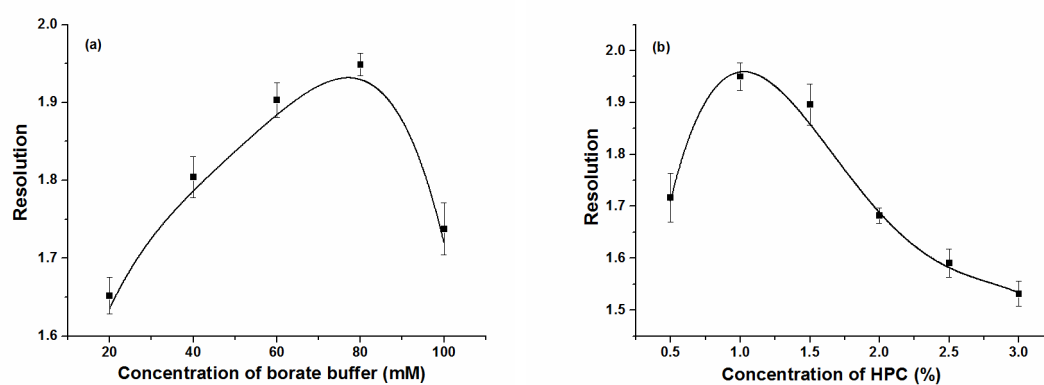

**Fig. S1** Effect of (a) borate buffer and (b) HPC concentration on the resolution of xylose and glucose. Other conditions are same as in Fig. 2 b.

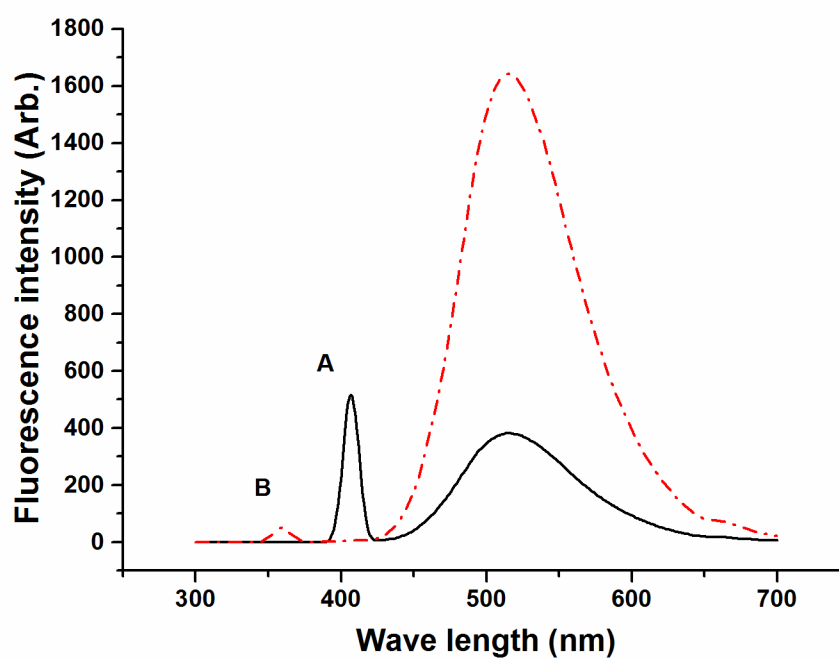

**Fig. S2** Fluorescence spectra of ANTS adduct with the 405nm and 356 nm exciting wavelength. A: 405nm; B: 356nm.

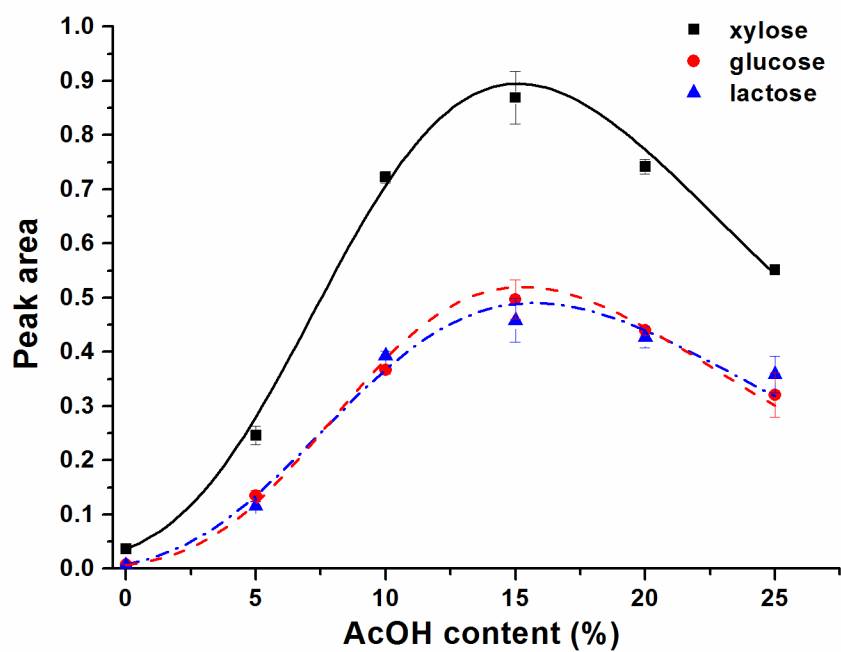

**Fig. S3** Effect of the concentration of acetic acid. Conditions are same as in Fig. 4.

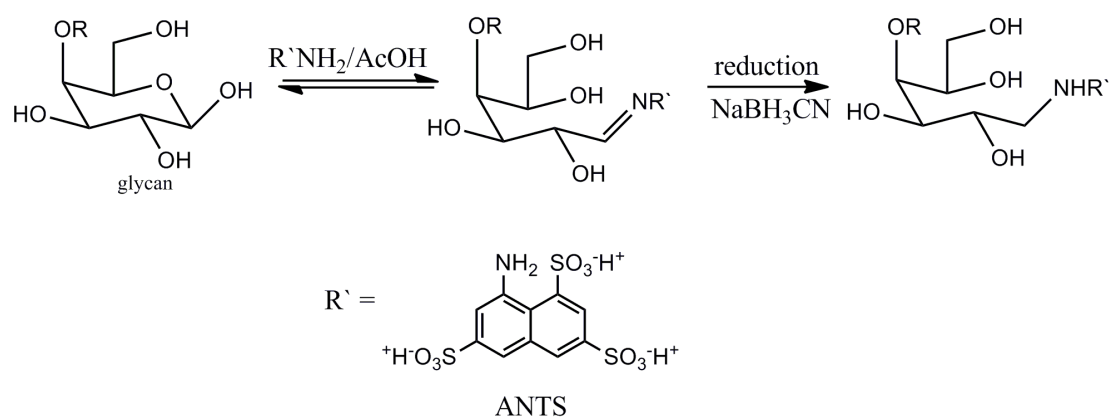

**Scheme S1** Reaction for the derivatization of saccharides with ANTS.

**Table S1** Determination of Saccharides in Human Urine.

| <i>Sample</i>                        | <i>Analyte</i> | <i>Content<br/>(mM)</i> | <i>Added<br/>(mM)</i> | <i>Totally found<br/>(mM)</i> | <i>Recovery<br/>(%)</i> |
|--------------------------------------|----------------|-------------------------|-----------------------|-------------------------------|-------------------------|
| Healthy<br>human urine<br>(Sample 2) | xylose         | n.d.                    | 1.00                  | 0.93                          | 92.8                    |
|                                      |                |                         | 2.00                  | 1.82                          | 91.0                    |
|                                      |                |                         | 3.00                  | 3.05                          | 101.5                   |
|                                      | glucose        | 0.49                    | 1.00                  | 1.57                          | 107.7                   |
|                                      |                |                         | 2.00                  | 2.66                          | 108.3                   |
|                                      |                |                         | 3.00                  | 3.33                          | 94.6                    |
|                                      | lactose        | n.d.                    | 1.00                  | 1.13                          | 112.7                   |
|                                      |                |                         | 2.00                  | 2.28                          | 113.8                   |
|                                      |                |                         | 3.00                  | 3.16                          | 105.3                   |
| Healthy<br>human urine<br>(Sample 3) | xylose         | n.d.                    | 1.00                  | 1.14                          | 114.3                   |
|                                      |                |                         | 2.00                  | 2.20                          | 109.8                   |
|                                      |                |                         | 3.00                  | 2.78                          | 92.9                    |
|                                      | glucose        | 0.40                    | 1.00                  | 1.41                          | 100.7                   |
|                                      |                |                         | 2.00                  | 2.64                          | 112.0                   |
|                                      |                |                         | 3.00                  | 3.82                          | 113.9                   |
|                                      | lactose        | n.d.                    | 1.00                  | 1.18                          | 117.5                   |
|                                      |                |                         | 2.00                  | 1.97                          | 98.9                    |
|                                      |                |                         | 3.00                  | 3.18                          | 105.9                   |
| Diabetics<br>urine<br>(Sample 4)     | xylose         | n.d.                    | 1.00                  | 0.98                          | 98.1                    |
|                                      |                |                         | 2.00                  | 1.99                          | 99.7                    |
|                                      |                |                         | 3.00                  | 2.86                          | 95.4                    |
|                                      | glucose        | 1.67                    | 1.00                  | 2.77                          | 109.6                   |
|                                      |                |                         | 2.00                  | 3.94                          | 113.7                   |
|                                      |                |                         | 3.00                  | 5.02                          | 111.6                   |
|                                      | lactose        | n.d.                    | 1.00                  | 1.17                          | 117.3                   |
|                                      |                |                         | 2.00                  | 2.27                          | 113.4                   |
|                                      |                |                         | 3.00                  | 3.09                          | 102.9                   |
